# Supplementary material
Source: PubMed Central journal article supplement (PMC4256514)
Supplement: supp_O114.041137_mcp.O114.041137-1.pdf [file supp_O114.041137_mcp.O114.041137-1.pdf]

1 **Supplementary Information**

2

3 - **Supplementary results**- Examples of annotation conflicts

4 - **List of Supplementary Figures**

5 **Supplementary Figure 1** – Gene Ontology Tree of corresponding GO terms of  
6 STEP nomenclature.

7 **Supplementary Figure 2** – Prediction tools and criteria scheme

8 **Supplementary Figure 3** – Decision tree of the annotation process

9 **Supplementary Figure 4** – Screenshot of the “more info” slide panel

10 **Supplementary Figure 5** – Screenshot of Flagellum protein complex as it is  
11 drawn in the STEPdb web interface

12

13 - **List of Supplementary Tables**

14 **Supplementary Table 1** - Mobile elements *E.coli* K-12 and BL21

15 a. Summary comparison

16 b. Detailed list of K-12 and BL21 mobile elements

17 **Supplementary Table 2** - Analysis of *E.coli* K-12 pseudogenes

18 c. Summary comparison

19 d. Detailed list of K-12 pseudogenes

20 **Supplementary Table 3** – Correlation between Gene Ontology terms and STEP  
21 sub-cellular topology nomenclature.

22 **Supplementary Table 4** - Synopsis of previous protein annotation in *E.coli* K-12  
23 and the newly proposed STEP annotation.

24 **Supplementary Table 5** – Annotation Process **A.** Criteria **B.** Annotation path

25 **Supplementary Table 6** – Manually curated *E.coli* K-12 proteins and protein  
26 complexes

27 a. List of literature references emerged from the manual annotation of  
28 K-12 proteins

29 b. Manually curated *E.coli* K-12 complexes

30 c. High-throughput studies used to identify proteins with verified sub-  
31 cellular topology

32 **Supplementary Table 7** – Proteins of unknown sub-cellular localization

33 **Supplementary Table 8** - Conflicts in current proteome databases concerning  
34 the annotation of sub-cellular topology of *E.coli* K-12 proteins

35 **Supplementary Table 9** - Re-evaluation of integral IM proteins

36 **Supplementary Table 10** - Common core proteome of *E.coli* Strains

37

## 37 **Supplementary Results**

### 38 **Annotation Conflicts**

39 Here we give some detailed examples of protein localizations that have been  
40 resolved:

41 **a.** Uniprot annotates proteins that are part of the flagellar filament (e.g. FliC and  
42 FliD) and hook (FlgK and FlgL) with the specified GO term "flagellum" with no  
43 clear sub-cellular location (Supplementary Table 4B). STEPdb classifies them as  
44 OM proteins facing the extra-cellular space (Figure 1).

45 **b.** YdeS, a protein of unknown function, is homologous to FimF that is a  
46 structural element of type 1 fimbriae (1). FimF along with the major fimbrial  
47 subunit protein, FimA, and FimH are required for mannose-specific adhesion (2).  
48 Therefore, YdeS was also classified as a peripheral outer membrane protein  
49 facing the extra-cellular space in STEPdb (F4; Figure 1).

50 **c.** The proposed integral IM proteome (3) was re-evaluated making use of the  
51 last generation bioinformatics tools and/or existing experimental evidence.  
52 Specifically, 222 of 1108 proposed to be IM proteins have been re-assigned in  
53 STEPdb to other sub-cellular locations (Supplementary Table 9). Most of them  
54 had been predicted as bitopic IM proteins (e.g. DapB and IivA) (4) but are no  
55 longer predicted as IM proteins by the latest bioinformatics tools and do not have  
56 obvious TMs. These proteins were re-classified as cytoplasmic. Four proteins  
57 (Pta, HofP, YbfL and YncH) had their N-terminal regions predicted as a TM in  
58 past version of TMHMM whereas in TMHMM v2.0 it is predicted as a signal  
59 peptide (3). This is an inherent problem of signal peptide and TM helices  
60 prediction due to some similarity of a TM region with the hydrophobic core (H-  
61 domain) of the signal peptide (5,6). These four proteins were re-classified as  
62 periplasmic.

63 **d.** 220 cytoplasmic proteins were re-classified as nucleoid-associated, based on  
64 experimental evidence (7-9).

65 **e.** Five proteins (RpoE, Psd, ArtP, GlnK and GlnQ) were registered in  
66 EchoLOCATION as cytoplasmic "experimental". These are now proposed as PIM  
67 proteins in STEPdb due to strong evidence of their association with the inner  
68 membrane. RpoE apart from its role as a sigma factor ( $\sigma$ E) is a PIM protein that  
69 senses miss-folding of periplasmic proteins by interacting with membrane protein  
70 RseA (10).

71 Psd is an interesting enzyme that is processed in a post-translational event into  
72 the heterodimer. This enzyme is unique among the known pyruvoyl-dependent  
73 decarboxylases because it is membrane-associated; this has been shown by both  
74 proteomic (11) and biochemical processes (12-14).

75 ArtP is the ATP carrier protein of arginine-uptake system (artPIQM); it has been  
76 detected in association with the inner membrane (11). GlnK binds to the  
77 membrane in an AmtB-dependent manner and acts as a negative regulator of the

78 transport activity of AmtB (15). Finally GlnQ has been isolated in association with  
79 the inner membrane in to proteomic studies (11,16)

80 **f.** Another functional class is the DNA-binding proteins that are localized on the  
81 nucleoid. STEPdb lists 264 nucleoid-localized proteins, amongst them seven  
82 sigma factors (RpoD, N, S, H, F, E and Fecl) and other transcription factors that  
83 have been identified via genomic searches for nucleic-acid protein interactions  
84 (7).

### 85 ***De novo* discovered experimentally verified proteins**

86 Here we give some examples of newly identified proteins with validated  
87 topologies:

- 88 a. YbgT and YneM are small membrane proteins that have been found to co-  
89 fractionate with the inner membrane and have their orientation on the IM  
90 identified experimentally (17).
  - 91 b. SodM and SodF are E.coli proteins that are close homologues of the  
92 RISodA (Rhizobium leguminosarum) that lack any known signal peptide  
93 motif. RISodA in is targeted to the periplasm in a SecA-dependent manner  
94 by a novel mechanism (18). Therefore by similarity these proteins are  
95 annotated as periplasmic proteins
  - 96 c. YagT protein contains a 49 amino acid Tat leader peptide that allows the  
97 export of the active heterotrimer to the periplasm. Tat substrates are  
98 matured in the cytoplasm prior to their translocation (19,20).
  - 99 d. PyrH is a PIM protein that has been shown via fluorescence microscopy  
100 to predominantly localized near the bacterial membranes of different cells  
101 undergoing septation and division (21,22).
- 102

102

e. Supplementary Figures

103

Supplementary Figure 1 – Gene Ontology Tree of corresponding GO terms of  
 104 STEP nomenclature. This is a schematic representation of the GO tree of only  
 105 the subset of GO terms that correspond to STEP topological categories. A  
 106 cartoon of a bacterial cell is drawn alongside the GO tree. Here the sub-cellular  
 107 compartments are in a bottom up order from the cytoplasm to the extra-cellular  
 108 space.

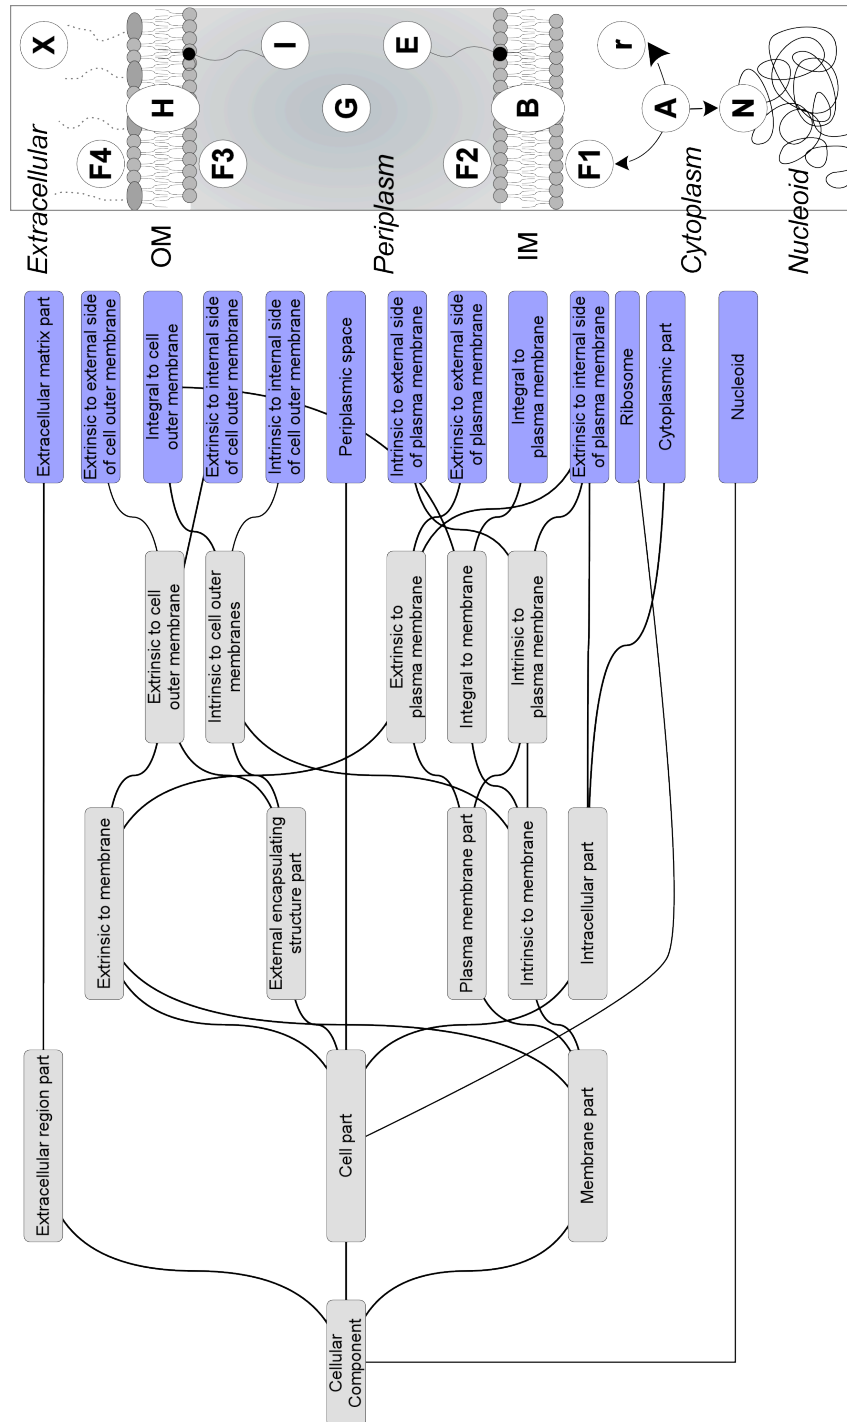

109  
 110

110 **Supplementary Figure 2 – Prediction tools and criteria scheme**  
 111 Here we describe in more detail the criteria we used in order to combine the  
 112 predictions of the bioinformatics tools. Some of the bioinformatics tools that we  
 113 utilized have overlapping prediction abilities. For example three tools, TMHMM,  
 114 Phobius and LipoP can predict transmembrane regions. Tools that predict  
 115 transmembrane alpha-helices lead to direct assignment to the IM protein class.  
 116 However the prediction of a Sec signal can only lead to the assumption that the  
 117 protein is localized somewhere across the IM (periplasm, in the OM or even  
 118 secreted fully from the cell). To further clarify the unique sub-cellular localization  
 119 we relied on experimental data (transcriptomic, proteomic and biochemical).

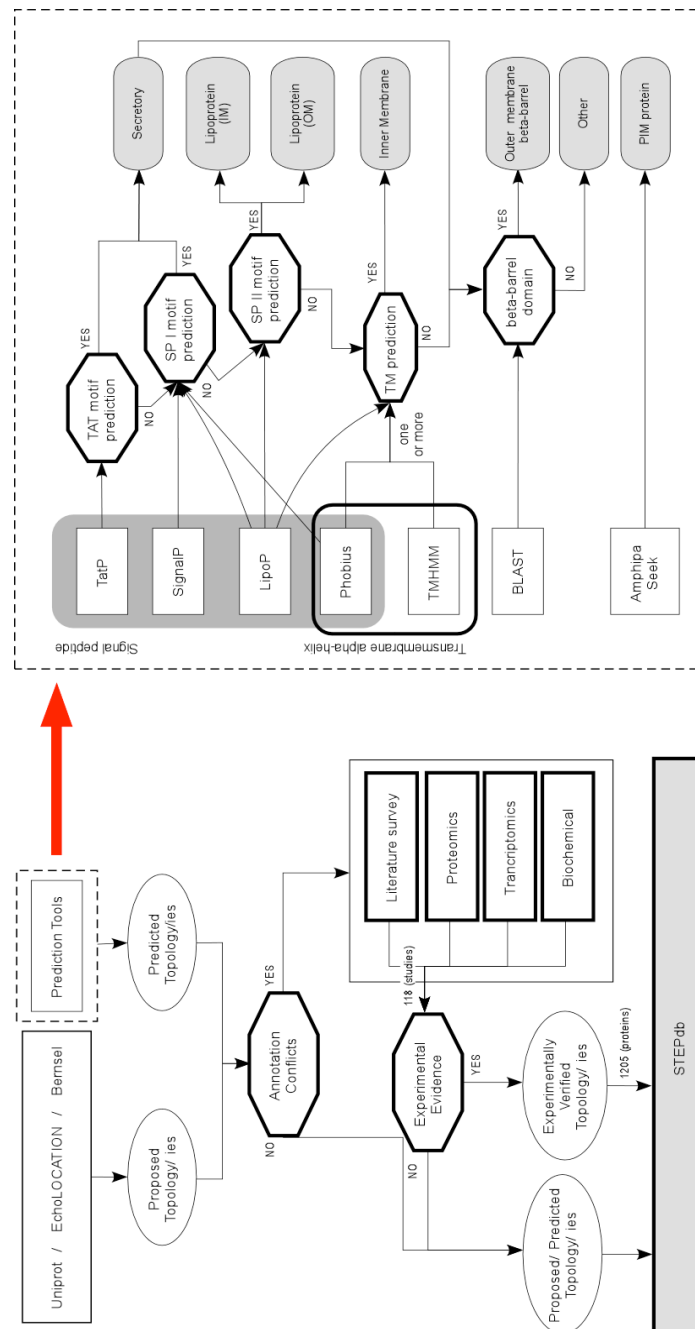

121           **Supplementary Figure 3** – Decision tree of the annotation process

122   In this flowchart we summarize the steps that we followed for the topological  
123   annotation of *E.coli* K-12 proteome. Three primary sources (Uniprot,  
124   EchoLOCATION, theoretical IM proteome (3)) were combined and the proposed  
125   sub-cellular topologies were compared. Proteins were separated into three cases  
126   “Matching”, “Conflicting”, “Unknown”. For proteins that were annotated as  
127   experimentally verified by Uniprot (23) or EchoLOCATION (24) we accepted the  
128   proposed topologies. To *de novo* annotate the “Unknown” and resolve the  
129   “Conflicting” we combined bioinformatic prediction tools, high throughput  
130   proteomic, genomic and biochemical data and manual literature survey.  
131

131

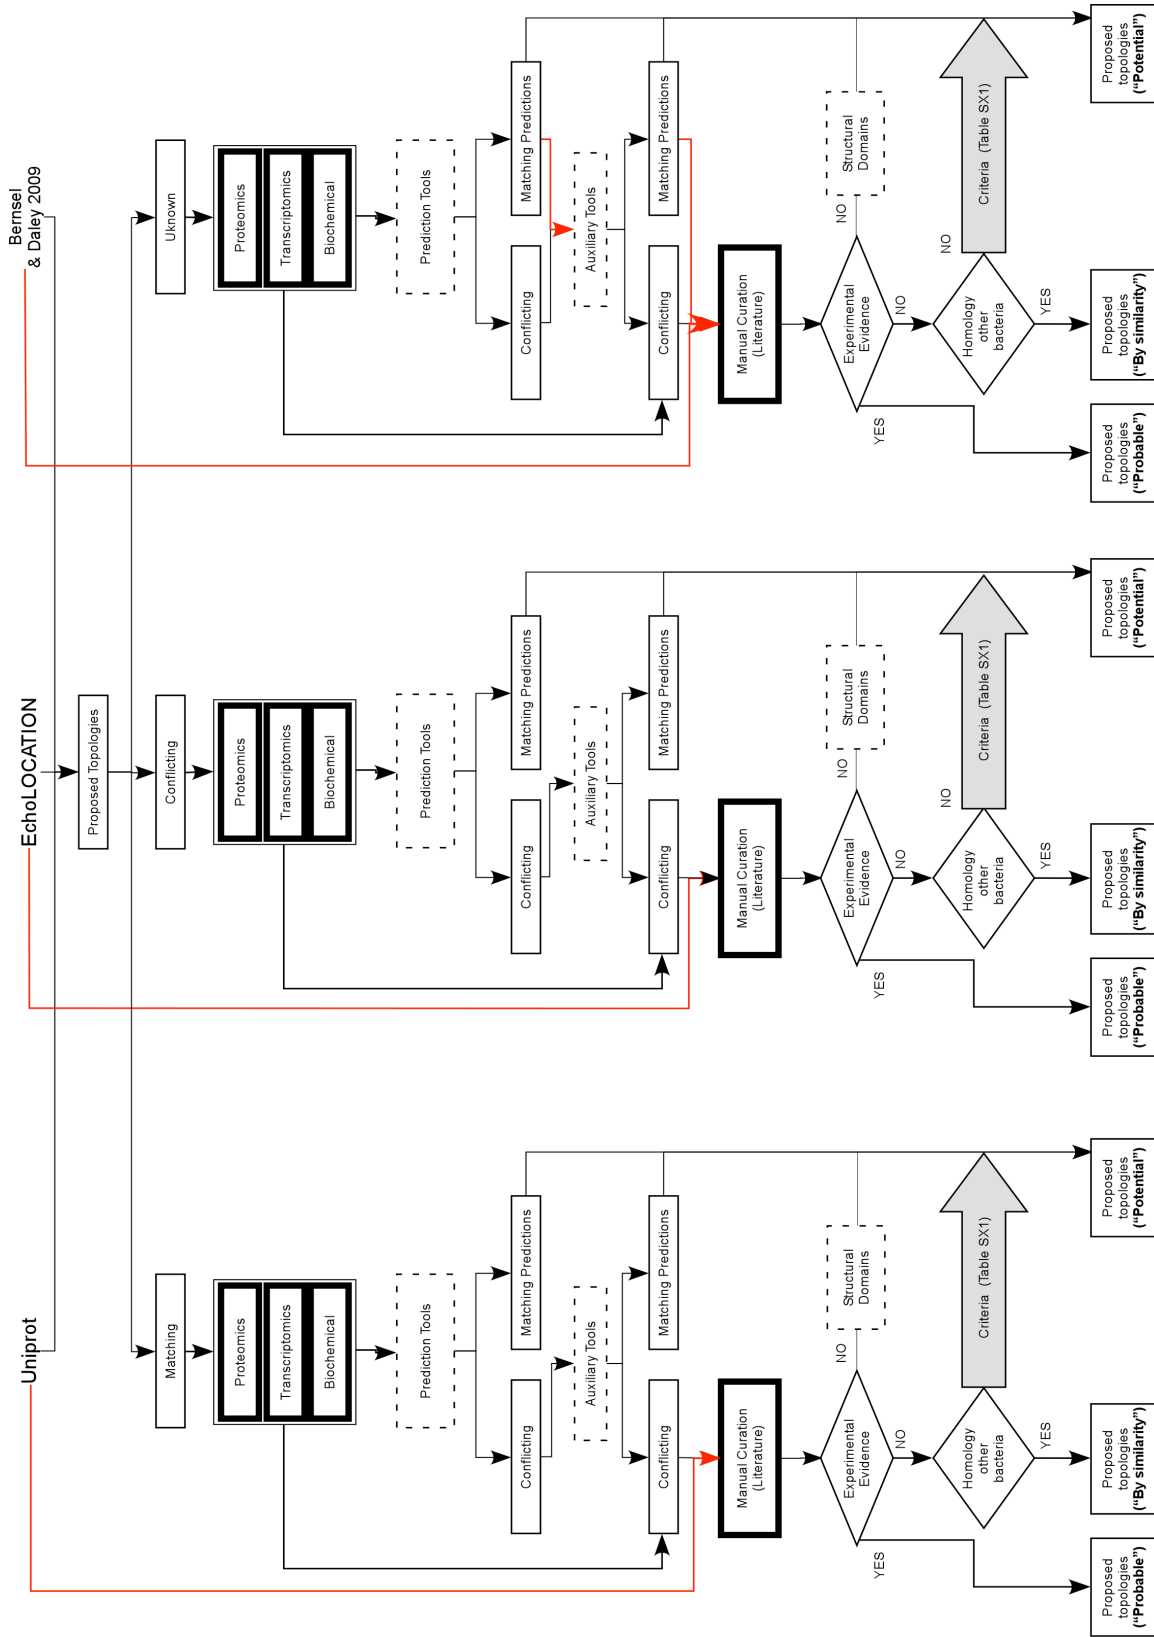

132  
133

133 **Supplementary Figure 4** – Screenshot of the “more info” slide panel  
 134 This is a screenshot of the information incorporated in the “more info” sliding  
 135 panel accompanying each protein in the web-interface.  
 136

| STPdb                                                                                                                                                                                                                                                                                                                                                                                                                                                                                                                                                                                                                                                                                                                                                                                                                                                                                                                                                                                                                                    |                     | Subcellular Localization |                  |                                     |                                                        |        |                            |                                                     |                              |                               |                              |                              |
|------------------------------------------------------------------------------------------------------------------------------------------------------------------------------------------------------------------------------------------------------------------------------------------------------------------------------------------------------------------------------------------------------------------------------------------------------------------------------------------------------------------------------------------------------------------------------------------------------------------------------------------------------------------------------------------------------------------------------------------------------------------------------------------------------------------------------------------------------------------------------------------------------------------------------------------------------------------------------------------------------------------------------------------|---------------------|--------------------------|------------------|-------------------------------------|--------------------------------------------------------|--------|----------------------------|-----------------------------------------------------|------------------------------|-------------------------------|------------------------------|------------------------------|
| Protein ID (Uniprot)                                                                                                                                                                                                                                                                                                                                                                                                                                                                                                                                                                                                                                                                                                                                                                                                                                                                                                                                                                                                                     | Accession (Uniprot) | Gene Name (Uniprot)      | Order Locus Name | Protein Name <sup>1</sup> (Uniprot) | Full Name                                              | Symbol | Uniprot Echo               | Localization                                        | First Level Targeting System | Second Level Targeting System | Third Level Secretion System | K-12 Basic Proteome (yes/no) |
| MREB_ECOLI                                                                                                                                                                                                                                                                                                                                                                                                                                                                                                                                                                                                                                                                                                                                                                                                                                                                                                                                                                                                                               | P0A9X4              | mreb<br><i>mreB rodZ</i> | b3251_3W3220     | Rod shape-determining protein mreb  | Peripheral inner membrane protein facing the cytoplasm | F1     | Cytoplasmic (Experimental) | Soluble protein detected in inner membrane fraction | TF                           | Yes                           | Yes                          | Yes                          |
| <p><a href="#">less info</a></p>                                                                                                                                                                                                                                                                                                                                                                                                                                                                                                                                                                                                                                                                                                                                                                                                                                                                                                                                                                                                         |                     |                          |                  |                                     |                                                        |        |                            |                                                     |                              |                               |                              |                              |
| <p><b>Manual Curation in STEP</b></p> <p><b>Comments:</b><br/>                     Periplasmic inner membrane protein. Cytoplasmic</p> <p><b>Notes:</b><br/>                     Bacterial actin homologue; is required for cell shape maintenance in most non-spherical bacteria, where it assembles into helical structures just underneath the cytoplasmic membrane; binds to the biopic inner membrane protein RodZ as monomer or multimer. Trigger factor-sensitive aggregation. Copurifies with trigger factor in pull down assays. PMID:19727290 PMID:19727290 Pgp-5 deletion mutants exhibit irregular distribution of MreB at the deformed zones. Pgp-5 deletion mutants of Escherichia coli exhibit irregular distribution of MreB at the deformed zones. PMID:24382763 PMID:12093953</p> <p><b>References:</b><br/>                     PMID:20168300 PMID:19727292 PMID:21816330 PMID:19008860 PMID:16391237<br/>                     PMID:19727290 PMID:24057063 PMID:17090951</p> <p><b>Pseudogene/Mobile Element:</b></p> |                     |                          |                  |                                     |                                                        |        |                            |                                                     |                              |                               |                              |                              |
| <p><b>Structural Annotation</b></p> <p>SCOP: A1635<br/>                     Alpha and beta proteins (a/b)<br/>                     SCOP: S12493</p> <p><b>Fold:</b><br/>                     SCOP: S3866<br/>                     Ribonuclease H-like motif</p> <p><b>Super Family:</b><br/>                     Actin-like ATPase domain<br/>                     SCOP: S3867</p> <p><b>Protein Family Domains</b></p> <p>Team domains<br/>                     Pfam: Pf0594<br/>                     SMART database<br/>                     SMART: smeb<br/>                     Protein Complexes<br/> <a href="#">Go to Complexes</a></p>                                                                                                                                                                                                                                                                                                                                                                                           |                     |                          |                  |                                     |                                                        |        |                            |                                                     |                              |                               |                              |                              |
| <p><b>mRNA Expression</b></p> <p>mRNA abundance (Taniguchi 2010)<br/>                     11.9413</p>                                                                                                                                                                                                                                                                                                                                                                                                                                                                                                                                                                                                                                                                                                                                                                                                                                                                                                                                    |                     |                          |                  |                                     |                                                        |        |                            |                                                     |                              |                               |                              |                              |
| <p><b>Protein Existence</b></p> <p>Mass spectrometry experiments<br/>                     Proteomics:<br/>                     PMID:1668699 PMID:16267253 PMID:12468465 PMID:17137328 PMID:19246461<br/>                     PMID:20222674 PMID:16967446 PMID:19767571 PMID:19115803 PMID:20932056<br/>                     PMID:17446537</p> <p>Proteomics / Inner Membrane fraction:<br/>                     PMID:17269111</p>                                                                                                                                                                                                                                                                                                                                                                                                                                                                                                                                                                                                        |                     |                          |                  |                                     |                                                        |        |                            |                                                     |                              |                               |                              |                              |
| <p><b>Protein abundance/solubility</b></p> <p>Protein abundance (Taniguchi 2010)<br/>                     210.659<br/>                     PaxDb:<br/>                     918.266 ppm<br/> <br/> <a href="#">show distribution</a></p>                                                                                                                                                                                                                                                                                                                                                                                                                                                                                                                                                                                                                                                                                                             |                     |                          |                  |                                     |                                                        |        |                            |                                                     |                              |                               |                              |                              |
| <p><b>Protein Hydrodynamics</b></p> <p>Protein Solubility<br/>                     Miwa et al 2009:<br/>                     62.52 %<br/>                     PMID:19251648</p> <p>Heat stability<br/>                     Heat stable (50C):<br/>                     no<br/>                     PMID:18083824</p> <p>Disorder<br/>                     Predict Disorder with IUPred tool<br/> <a href="#">Predict Now</a></p>                                                                                                                                                                                                                                                                                                                                                                                                                                                                                                                                                                                                         |                     |                          |                  |                                     |                                                        |        |                            |                                                     |                              |                               |                              |                              |
| <p><b>Bioinformatic tools and predictions</b></p> <p>SignalPeptide<br/>                     No</p> <p>Cleavage site amino acid:<br/>                     41<br/>                     Cleavage Score (Cmax):<br/>                     0.1377<br/>                     IUPred_L0</p> <p>Prediction:<br/>                     C/T<br/>                     Cleavage site amino acid:<br/>                     0<br/>                     Score:<br/>                     -0.200913<br/>                     Cleavage Rule:</p> <p>TMHMM V2.0<br/>                     Number of TMs:<br/>                     0</p> <p>Phobius<br/>                     Signal Peptide:<br/>                     no<br/>                     Number of TMs:<br/>                     0</p> <p>ESORTB (3.0.2)<br/>                     Localization:<br/>                     Cytoplasmic<br/>                     Score:<br/>                     9.97<br/> <a href="#">Predict Now</a></p>                                                                 |                     |                          |                  |                                     |                                                        |        |                            |                                                     |                              |                               |                              |                              |





## Supplementary Tables

145

146

147 **Supplementary Table 1** - Mobile elements *E.coli* K-12 and BL21

148 **a.** Summary comparison: A comparison between the two *E. coli* strains regarding  
149 their proteomes, mobile elements and pseudogenes. Mobile elements include  
150 prophage integrases, transposases, insertion and Rhs elements (for further  
151 explanation, refer to the actual table). A set of 381 genes (out of a total of 624)  
152 located within gene islands that upon deletion have no effect in the growth of the  
153 bacterium in LB medium (25) are also considered as mobile elements in this  
154 study. The *E.coli* “core proteome”, as defined by proteome comparison between  
155 43 *E.coli* strains (Supplementary Table 10) is also shown here. A similar  
156 comparison was performed for the K-12 and BL21(DE3) proteomes were 4037  
157 and 4483 proteins correspondingly were found to belong to the “common  
158 proteome” between the two strains. In both strains there were proteins with  
159 multiple homologs, 464 and 52 *E.coli* K-12 and BL21 proteins correspondingly  
160 were matched to more than one homologue (data not shown in table).

161 **b.** Detailed list of *E. coli* K-12 and BL21(DE3) mobile elements.

162

163 **Supplementary Table 2** - Analysis of *E.coli* K-12 pseudogenes

164 Summary comparison:

165 **a.** Breakdown table of possible pseudogenes as reported in Uniprot , EcoGene  
166 (26) and by Ochman (27). The potential pseudogenes have been differentiated  
167 according to their protein existence annotation in Uniprot (evidence at protein and  
168 transcript level, predicted, inferred from homology and uncertain).

169 **b.** Detailed list of K-12 pseudogenes. Pseudogenes marked with purple have  
170 been reported to synthesize protein (28) indicating that these are functional  
171 genes.

172

173 **Supplementary Table 3** – Correlation between GO terms and STEP  
174 nomenclature.

175 STEP classifies proteins into thirteen categories which correspond to different  
176 sub-cellular localizations. This table maps STEP categories to the most closely  
177 related gene ontology terms. GO name and ID are provided (29).

178

179 **Supplementary Table 4** - Synopsis of previously existing protein annotation and  
180 newly proposed STEP annotation.

181 **a.** STEPdb and summary of the sub-cellular annotations of the two *E.coli* strains  
182 **b,c.** Existing topological annotations of Uniprot (23) and EchoLOCATION (24)  
183 are summarized in terms of STEPdb nomenclature. Some of the existing Uniprot  
184 or EchoLOCATION annotations could not be discriminated in order to be  
185 assigned to a distinct STEPdb class. **d.** theoretical IM proteome as defined in  
186 Bernsel and Daley (3). In total, 1108 out of 1133 proteins were mapped to the

187 K-12 reference proteome maintained in Uniprot. **e.** List of predicted proteins in  
188 EchoLOCATION. 4243 of the 4345 listed proteins were mapped to the reference  
189 *E.coli* proteome. The remaining proteins are unknown coding sequences,  
190 pseudogenes not existing or deleted from Uniprot and in some case duplicates of  
191 the same protein.

192

### 193 **Supplementary Table 5 - Annotation Criteria**

194 List of formalized rules that describe the way we handled the contradictions  
195 among the bioinformatic tools. These criteria were applied only at the last step of  
196 the annotation process and if during manual curation step no indication of  
197 experimental evidence was discovered.

198

### 199 **Supplementary Table 6 – Manually curated *E.coli* K-12 proteins and protein 200 complexes**

201 **a.** Inventory of 1205 experimentally verified proteins that have been discovered  
202 during the manual curation process. Each verified protein is accompanied by the  
203 corresponding list of pmids that justified the proposed location in STEPdb. The  
204 proposed topology is associated with a characterization of the level of evidence.  
205 There are two levels of evidence: “Experimental” and “Probable”. The term  
206 “Experimental” is used in cases of strong experimental data whereas the term  
207 “Probable” indicates that there exists some experimental evidence.

### 208 **b. Manually curated *E.coli* K-12 complexes**

209 List of 61 protein complexes discovered during manual curation process.

210 **c.** High-throughput studies used to identify proteins with verified sub-cellular  
211 topology

212 List of high throughput studies and the corresponding experimentally identified  
213 proteins. Among these studies: 11 proteomic studies coupled with sub-  
214 fractionation methods, two genomic studies, two biochemical analysis and one  
215 fluorescent microscopy study.

216

### 217 **Supplementary Table 7 – Proteins of unknown sub-cellular localization**

218 List of 36 proteins that were previously of unknown sub-cellular topology, based  
219 on the three resources (Uniprot, EchoLOCATION, Bernsel (10)). Proteins that  
220 their sub-cellular location has been experimentally confirmed are highlighted with  
221 light yellow. The remaining proteins were assigned to sub-cellular class based on  
222 the prediction of the tools.

223

### 224 **Supplementary Table 8 - Conflicts in current proteome databases concerning 225 the annotation of sub-cellular topology of *E.coli* proteins**

226 Topological annotation conflicts initially existed even between the two databases,  
227 Uniprot and EchoLOCATION and/or the experimental set of IM proteins  
228 (3,23,24). This table lists 601 proteins with conflicting topologies among the three  
229 resources (Uniprot, EchoLOCATION, Bernsel and Daley, 2009) exhibited  
230 contradicting sub-cellular topologies.

231

232 **Supplementary Table 9 - Re-evaluation of IM proteins**

233 This table lists the predicted IM proteins that have been proposed by Bernsel and  
234 Daley (2009) that STEP re-classifies them as non IM proteins. This  
235 reconsideration of topology was based on next generation prediction tools:  
236 TMHMM v2.0, Phobius, LipoP, SignalP4.0 (5,30-32), current annotation in  
237 Uniprot and EchoLOCATION (23,24) and existing experimental data found in  
238 literature.

239

240 **Supplementary Table 10 - Common core *E.coli* Strains**

241 Detailed names of the 43 *E.coli* strains used to define the core proteome (see  
242 also “experimental procedures”).

243

243 **References**

- 244 1. Waksman, G., Hultgren, S.J. (2009) Structural biology of the chaperone-  
245 usher pathway of pilus biogenesis. *Nat Rev Microbiol*, **7**, 765-774.
- 246 2. Klemm, P., Christiansen, G. (1987) Three fim genes required for the  
247 regulation of length and mediation of adhesion of Escherichia coli type 1  
248 fimbriae. *Mol Gen Genet*, **208**, 439-445.
- 249 3. Bernsel, A., Daley, D.O. (2009) Exploring the inner membrane proteome  
250 of Escherichia coli: which proteins are eluding detection and why? *Trends*  
251 *Microbiol*, **17**, 444-449.
- 252 4. Bernsel, A., Viklund, H., Falk, J., *et al.* (2008) Prediction of membrane-  
253 protein topology from first principles. *Proc Natl Acad Sci U S A*, **105**,  
254 7177-7181.
- 255 5. Kall, L., Krogh, A., Sonnhammer, E.L. (2007) Advantages of combined  
256 transmembrane topology and signal peptide prediction--the Phobius web  
257 server. *Nucleic Acids Res*, **35**, W429-432.
- 258 6. Kall, L., Krogh, A., Sonnhammer, E.L. (2004) A combined transmembrane  
259 topology and signal peptide prediction method. *J Mol Biol*, **338**, 1027-  
260 1036.
- 261 7. Ishihama, A. (2012) Prokaryotic genome regulation: a revolutionary  
262 paradigm. *Proc Jpn Acad Ser B Phys Biol Sci*, **88**, 485-508.
- 263 8. Metzner, M., Germer, J., Hengge, R. (2004) Multiple stress signal  
264 integration in the regulation of the complex sigma S-dependent csiD-ygaF-  
265 gabDTP operon in Escherichia coli. *Mol Microbiol*, **51**, 799-811.
- 266 9. Liu, X., Matsumura, P. (1995) An alternative sigma factor controls  
267 transcription of flagellar class-III operons in Escherichia coli: gene  
268 sequence, overproduction, purification and characterization. *Gene*, **164**,  
269 81-84.
- 270 10. Collinet, B., Yuzawa, H., Chen, T., *et al.* (2000) RseB binding to the  
271 periplasmic domain of RseA modulates the RseA:sigmaE interaction in the  
272 cytoplasm and the availability of sigmaE.RNA polymerase. *J Biol Chem*,  
273 **275**, 33898-33904.
- 274 11. Papanastasiou, M., Orfanoudaki, G., Koukaki, M., *et al.* (2013) The  
275 Escherichia coli peripheral inner membrane proteome. *Mol Cell*  
276 *Proteomics*, **12**, 599-610.
- 277 12. Li, Q.X., Dowhan, W. (1988) Structural characterization of Escherichia coli  
278 phosphatidylserine decarboxylase. *J Biol Chem*, **263**, 11516-11522.
- 279 13. Dowhan, W., Li, Q.X. (1992) Phosphatidylserine decarboxylase from  
280 Escherichia coli. *Methods Enzymol*, **209**, 348-359.
- 281 14. Tyhach, R.J., Hawrot, E., Satre, M., *et al.* (1979) Increased synthesis of  
282 phosphatidylserine decarboxylase in a strain of Escherichia coli bearing a  
283 hybrid plasmid. Altered association of enzyme with the membrane. *J Biol*  
284 *Chem*, **254**, 627-633.

- 285 15. Coutts, G., Thomas, G., Blakey, D., *et al.* (2002) Membrane sequestration  
286 of the signal transduction protein GlnK by the ammonium transporter  
287 AmtB. *EMBO J*, **21**, 536-545.
- 288 16. Stenberg, F., Chovanec, P., Maslen, S.L., *et al.* (2005) Protein complexes  
289 of the Escherichia coli cell envelope. *J Biol Chem*, **280**, 34409-34419.
- 290 17. Fontaine, F., Fuchs, R.T., Storz, G. (2011) Membrane localization of small  
291 proteins in Escherichia coli. *J Biol Chem*, **286**, 32464-32474.
- 292 18. Krehenbrink, M., Edwards, A., Downie, J.A. (2011) The superoxide  
293 dismutase SodA is targeted to the periplasm in a SecA-dependent manner  
294 by a novel mechanism. *Mol Microbiol*, **82**, 164-179.
- 295 19. Tullman-Ercek, D., DeLisa, M.P., Kawarasaki, Y., *et al.* (2007) Export  
296 pathway selectivity of Escherichia coli twin arginine translocation signal  
297 peptides. *J Biol Chem*, **282**, 8309-8316.
- 298 20. Neumann, M., Mittelstadt, G., Iobbi-Nivol, C., *et al.* (2009) A periplasmic  
299 aldehyde oxidoreductase represents the first molybdopterin cytosine  
300 dinucleotide cofactor containing molybdo-flavoenzyme from Escherichia  
301 coli. *FEBS J*, **276**, 2762-2774.
- 302 21. Landais, S., Gounon, P., Laurent-Winter, C., *et al.* (1999)  
303 Immunochemical analysis of UMP kinase from Escherichia coli. *J Bacteriol*,  
304 **181**, 833-840.
- 305 22. Watt, R.M., Wang, J., Leong, M., *et al.* (2007) Visualizing the proteome of  
306 Escherichia coli: an efficient and versatile method for labeling  
307 chromosomal coding DNA sequences (CDSs) with fluorescent protein  
308 genes. *Nucleic Acids Res*, **35**, e37.
- 309 23. Dimmer, E.C., Huntley, R.P., Alam-Faruque, Y., *et al.* (2012) The UniProt-  
310 GO Annotation database in 2011. *Nucleic Acids Res*, **40**, D565-570.
- 311 24. Horler, R.S., Butcher, A., Papangelopoulos, N., *et al.* (2009)  
312 EchoLOCATION: an in silico analysis of the subcellular locations of  
313 Escherichia coli proteins and comparison with experimentally derived  
314 locations. *Bioinformatics*, **25**, 163-166.
- 315 25. Pósfai, G., Plunkett, G., 3rd, Feher, T., *et al.* (2006) Emergent properties  
316 of reduced-genome Escherichia coli. *Science*, **312**, 1044-1046.
- 317 26. Rudd, K.E. (2000) EcoGene: a genome sequence database for *Escherichia*  
318 *coli* K-12. *Nucleic Acids Res*, **28**, 60-64.
- 319 27. Ochman, H., Davalos, L.M. (2006) The nature and dynamics of bacterial  
320 genomes. *Science*, **311**, 1730-1733.
- 321 28. Iwasaki, M., Miwa, S., Ikegami, T., *et al.* (2010) One-Dimensional  
322 Capillary Liquid Chromatographic Separation Coupled with Tandem Mass  
323 Spectrometry Unveils the *Escherichia coli* Proteome on a Microarray Scale.  
324 *Analytical Chemistry*, **82**, 2616-2620.
- 325 29. Ashburner, M., Ball, C.A., Blake, J.A., *et al.* (2000) Gene ontology: tool for  
326 the unification of biology. The Gene Ontology Consortium. *Nat Genet*, **25**,  
327 25-29.

- 328 30. Krogh, A., Larsson, B., von Heijne, G., *et al.* (2001) Predicting  
329 transmembrane protein topology with a hidden Markov model: application  
330 to complete genomes. *J Mol Biol*, **305**, 567-580.
- 331 31. Juncker, A.S., Willenbrock, H., Von Heijne, G., *et al.* (2003) Prediction of  
332 lipoprotein signal peptides in Gram-negative bacteria. *Protein Sci*, **12**,  
333 1652-1662.
- 334 32. Petersen, T.N., Brunak, S., von Heijne, G., *et al.* (2011) SignalP 4.0:  
335 discriminating signal peptides from transmembrane regions. *Nat Methods*,  
336 **8**, 785-786.
- 337
- 338
